# Supplementary material for: Nanospace-confined preparation of uniform nitrogen-doped graphene quantum dots for highly selective fluorescence dual-function determination of Fe3+and ascorbic acid
Source: Royal Society of Chemistry journal article supplement (doi:10.1039/c7ra13001e), 2018-01-01
Supplement: c7ra13001e1.pdf [file c7ra13001e1.pdf]

*Supplementary materials*

**Nanospace-confined preparation of uniform nitrogen-doped graphene quantum dots for highly selective fluorescence dual-function determination of Fe<sup>3+</sup> and ascorbic acid**

Hongbo Xu, Shenghai Zhou\*, Jinyu Liu and Yajun Wei

*College of Chemistry and Chemical Engineering, Hebei Normal University for Nationalities,*

*Chengde 067000, China*

---

Corresponding author. Tel.: +86 314 2370567

E-mail address: zhoush10@mails.jlu.edu.cn

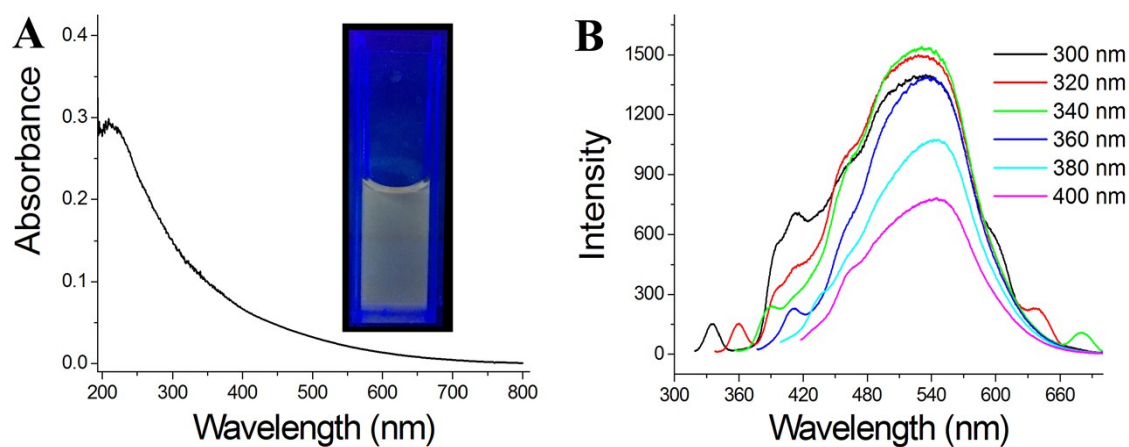

**Figure S1.** (a) UV-vis absorption spectrum of the N-GQDs dispersed in water. Inset: photograph of the N-GQDs solutions taken under illumination of UV light (365 nm). (b) Fluorescence emission spectra of the N-GQDs aqueous solution at different excitation wavelengths from 300 to 400

**Table S1.** Determination of  $\text{Fe}^{3+}$  in tap water samples (n=3).

|          | Added<br>( $\mu\text{M}$ ) | Detected<br>( $\mu\text{M}$ ) | Recovery<br>(%) | RSD<br>(%) |
|----------|----------------------------|-------------------------------|-----------------|------------|
| Sample 1 | 10                         | 10.36                         | 103.6           | 4.5        |
| Sample 2 | 20                         | 18.62                         | 93.1            | 3.2        |
| Sample 3 | 30                         | 32.19                         | 107.3           | 5.7        |

**Table S2.** Determination of AA in fish blood samples (n=3).

|          | Added<br>( $\mu\text{M}$ ) | Detected<br>( $\mu\text{M}$ ) | Recovery<br>(%) | RSD<br>(%) |
|----------|----------------------------|-------------------------------|-----------------|------------|
| Sample 1 | 10                         | 9.53                          | 95.3            | 4.8        |
| Sample 2 | 30                         | 30.45                         | 101.5           | 1.5        |
| Sample 3 | 40                         | 42.48                         | 106.2           | 2.7        |
